# Supplementary material
Source: PubMed Central journal article supplement (PMC3435180)
Supplement: 1211910109_pnas.201211910SI.pdf [file 1211910109_pnas.201211910SI.pdf]

# Supporting Information

Ng and Oldstone 10.1073/pnas.1211910109

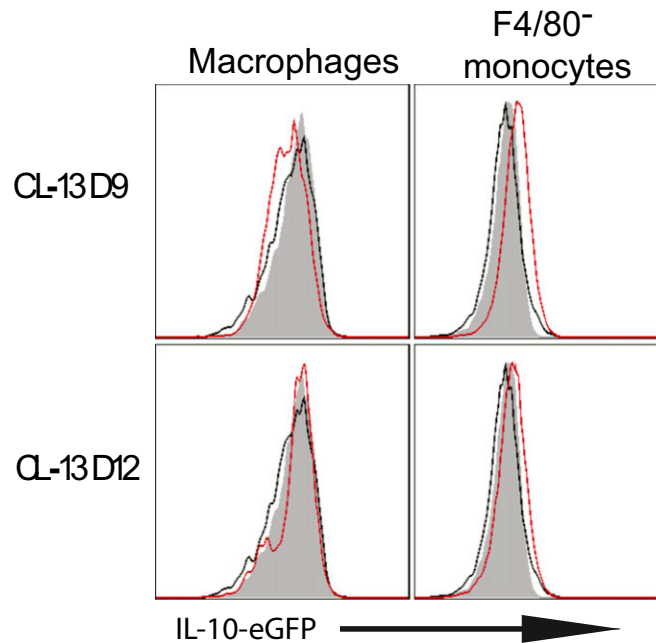

**Fig. S1.** Comparison of IL-10-eGFP fluorescence in macrophage and monocyte populations. Histograms depict IL-10-eGFP fluorescence of macrophages and F4/80<sup>-</sup> monocytes in non-GFP C57BL/6 mice (gray), naive VertX mice (black), and VertX mice 9 d after infection with  $2 \times 10^6$  pfu CL-13 (red). Data are representative of groups of three mice in three independent experiments.

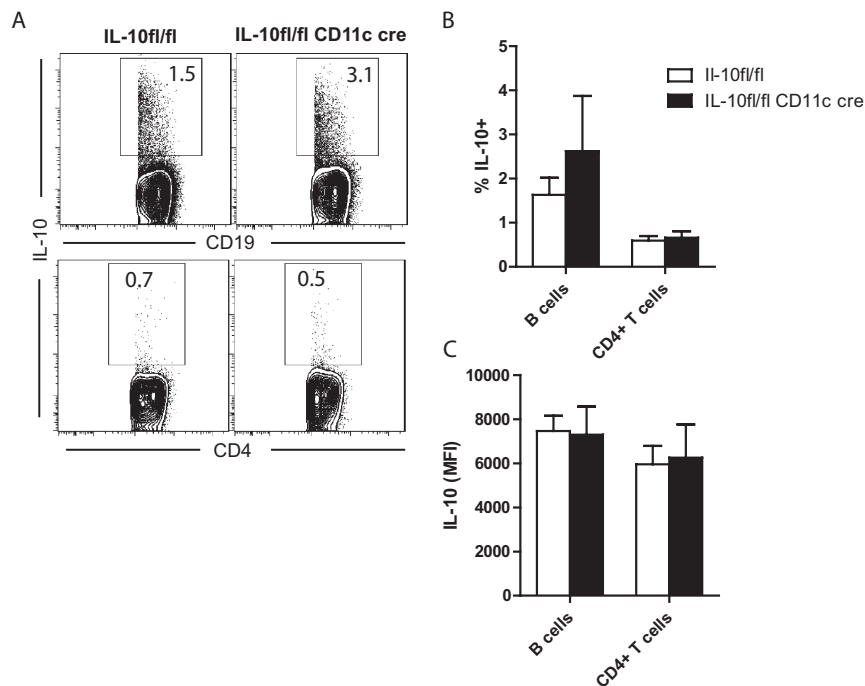

**Fig. S2.** IL-10 expression in B cells and CD4<sup>+</sup> T cells in IL-10<sup>fl/fl</sup> CD11c cre mice. (A) Flow plots depict staining for IL-10 in B cells (Upper) and CD4<sup>+</sup> T cells (Lower) from IL-10<sup>fl/fl</sup> CD11c cre mice infected with  $2 \times 10^6$  pfu CL-13 at 10 dpi. (B and C) Graphs show the percentage (B) and the mean fluorescent intensity of IL-10 staining (C) of B cells and CD4<sup>+</sup> T cells that express IL-10. No significant differences were noted between groups.
